# Supplementary material for: CCL2-CCR2 axis recruits tumor associated macrophages to induce immune evasion through PD-1 signaling in esophageal carcinogenesis
Source: PubMed Central journal article supplement (PMC7045401; doi:10.1186/s12943-020-01165-x), 2020-02-27
Supplement: 12943_2020_1165_MOESM4_ESM.pdf [file 12943_2020_1165_MOESM4_ESM.pdf]

**Supplementary table S1. Samples list in the ESCC cohort (100 cases)**

| Number | Sample ID | Cancer Type | Sex    | Tumor Size (cm) | Overall Survival (Months) | Overall Survival Status | CCL2-IHC Score | CD68 positive cell |
|--------|-----------|-------------|--------|-----------------|---------------------------|-------------------------|----------------|--------------------|
| 1      | D08A0181  | ESCC        | Male   | 5*2.5*1.5       | 58                        | DECEASED                | 8              | 150                |
| 2      | D08A0184  | ESCC        | Male   | 4.1*3*1.4       | 26                        | DECEASED                | 2              | 400                |
| 3      | D08A0185  | ESCC        | Male   | 4.5*3.5*1       | 13                        | DECEASED                | 8              | 50                 |
| 4      | D08A0187  | ESCC        | Male   | 6.5*2.3*2.5     | 107                       | LIVING                  | 3              | 30                 |
| 5      | D08A0188  | ESCC        | Male   | 3*2*1.5         | 15                        | DECEASED                | 2              | 50                 |
| 6      | D08A0189  | ESCC        | Male   | NA              | 106                       | LIVING                  | 6              | 100                |
| 7      | D08A0194  | ESCC        | Female | 3.5*3.5*1       | 6                         | DECEASED                | 12             | 40                 |
| 8      | D08A0196  | ESCC        | Female | 7.5*6*1         | 60                        | DECEASED                | 2              | 60                 |
| 9      | D08A0260  | ESCC        | Male   | 3*1.5*1.2       | 31                        | DECEASED                | 2              | 100                |
| 10     | D08A0284  | ESCC        | Male   | 4.5*3*2         | 51                        | DECEASED                | 8              | 300                |
| 11     | D08A0285  | ESCC        | Female | 3.5*2*2         | 47                        | DECEASED                | 6              | 80                 |
| 12     | D08A0286  | ESCC        | Male   | 3*1.5*0.5       | 29                        | DECEASED                | 3              | 50                 |
| 13     | D08A0290  | ESCC        | Male   | 0.5*1.2         | 22                        | DECEASED                | 3              | 20                 |
| 14     | D08A0293  | ESCC        | Female | 2.5*1.5*1       | 35                        | DECEASED                | 4              | 90                 |
| 15     | D08A0294  | ESCC        | Male   | 4*2*1.5         | 10                        | DECEASED                | 6              | 30                 |
| 16     | D08A0333  | ESCC        | Female | 5*5*1           | 100                       | LIVING                  | 4              | 400                |
| 17     | D08A0334  | ESCC        | Male   | 4*2*2           | 2                         | DECEASED                | 8              | 80                 |
| 18     | D08A0337  | ESCC        | Male   | 1*1*0.5,1.2*1*1 | 23                        | DECEASED                | 12             | 150                |
| 19     | D08A0340  | ESCC        | Male   | 7.5*5*1.5       | 9                         | DECEASED                | 2              | 100                |
| 20     | D08A0342  | ESCC        | Male   | 6*3*1.5         | 27                        | DECEASED                | 12             | 300                |
| 21     | D08A0373  | ESCC        | Male   | 10*8*2          | 6                         | DECEASED                | 9              | 60                 |
| 22     | D08A0376  | ESCC        | Male   | 5.5*4.5*1.5     | 43                        | DECEASED                | 6              | 100                |
| 23     | D08A0379  | ESCC        | Male   | 2*2*1           | 44                        | DECEASED                | 6              | 60                 |
| 24     | D08A0380  | ESCC        | Male   | 3*3*1           | 8                         | DECEASED                | 6              | 50                 |
| 25     | D08A0381  | ESCC        | Female | 5*3*1           | 9                         | DECEASED                | 4              | 70                 |
| 26     | D08A0383  | ESCC        | Male   | 2.5*1.5*0.5     | 16                        | DECEASED                | 4              | 60                 |
| 27     | D08A0384  | ESCC        | Male   | 5*3.5*1.5       | 97                        | LIVING                  | 8              | 200                |
| 28     | D08A0385  | ESCC        | Male   | 6*6*1.5         | 26                        | DECEASED                | 12             | 50                 |
| 29     | D08A0388  | ESCC        | Female | 4*3*1           | 97                        | LIVING                  | 6              | 150                |
| 30     | D08A0391  | ESCC        | Male   | 6*4*1.5         | 33                        | DECEASED                | 6              | 300                |
| 31     | D08A0393  | ESCC        | Female | 5*4*1           | 10                        | DECEASED                | 9              | 150                |
| 32     | D08A0394  | ESCC        | Male   | 4*2.5*1.5       | 6                         | DECEASED                | 12             | 200                |
| 33     | D08A0395  | ESCC        | Male   | 3*1.5*1         | 8                         | DECEASED                | 8              | 80                 |
| 34     | D08A0397  | ESCC        | Male   | NA              | 2                         | DECEASED                | 12             | 200                |
| 35     | D08A0400  | ESCC        | Male   | 5*3.5*1         | 43                        | DECEASED                | 8              | 200                |
| 36     | D08A0401  | ESCC        | Male   | 4*3*1           | 44                        | DECEASED                | 6              | 300                |
| 37     | D08A0402  | ESCC        | Male   | 3*2.5*1         | 95                        | LIVING                  | 4              | 40                 |
| 38     | D08A0403  | ESCC        | Male   | 4.5*3*0.6       | 23                        | DECEASED                | 6              | 80                 |
| 39     | D08A0404  | ESCC        | Male   | 3*3*3           | 73                        | LIVING                  | 6              | 80                 |
| 40     | D08A0405  | ESCC        | Male   | 8*4*2           | 4                         | DECEASED                | 8              | 200                |
| 41     | D08A0477  | ESCC        | Male   | 4*2*1, 6*5*4    | 9                         | DECEASED                | 12             | 300                |
| 42     | D08A0569  | ESCC        | Male   | 7*3.5*2         | 13                        | DECEASED                | 0              | 10                 |
| 43     | D08A0571  | ESCC        | Male   | 5*2*1           | 15                        | DECEASED                | 0              | 70                 |
| 44     | D08A0572  | ESCC        | Male   | 6*4*1           | 13                        | DECEASED                | 9              | 100                |
| 45     | D08A0573  | ESCC        | Female | 4.5*3*1.5       | 2                         | DECEASED                | 6              | 60                 |
| 46     | D08A0577  | ESCC        | Female | 4*3*1.5         | 88                        | LIVING                  | 2              | 100                |
| 47     | D08A0579  | ESCC        | Male   | 5*3.5*1.5       | 33                        | DECEASED                | 9              | 150                |
| 48     | D08A0580  | ESCC        | Male   | 2.5*2*0.5       | 12                        | DECEASED                | 9              | 400                |

|     |          |      |        |             |    |          |    |     |
|-----|----------|------|--------|-------------|----|----------|----|-----|
| 49  | D08A0581 | ESCC | Female | 5*4*2       | 12 | DECEASED | 4  | 200 |
| 50  | D08A0582 | ESCC | Male   | 6*5*1.5 ;   | 88 | LIVING   | 4  | 100 |
| 51  | D08A0583 | ESCC | Male   | 3.8*2*1     | 4  | DECEASED | 12 | 150 |
| 52  | D08A0584 | ESCC | Male   | 3*2.5*1     | 5  | DECEASED | 12 | 200 |
| 53  | D08A0588 | ESCC | Male   | 4*2.5*1     | 30 | DECEASED | 6  | 20  |
| 54  | D08A0589 | ESCC | Male   | NA          | 15 | DECEASED | 4  | 20  |
| 55  | D08A0593 | ESCC | Male   | 4*4*1       | 87 | LIVING   | 4  | 10  |
| 56  | D08A0595 | ESCC | Female | NA          | 5  | DECEASED | 8  | 100 |
| 57  | D08A0596 | ESCC | Female | 6*5*1       | 22 | DECEASED | 9  | 100 |
| 58  | D08A0648 | ESCC | Female | 4*2*1       | 5  | DECEASED | 8  | 300 |
| 59  | D08A0649 | ESCC | Male   | 5*3*1       | 0  | DECEASED | 9  | 200 |
| 60  | D08A0650 | ESCC | Male   | 7*3*1       | 5  | DECEASED | 12 | 100 |
| 61  | D08A0652 | ESCC | Male   | NA          | 86 | LIVING   | 9  | 300 |
| 62  | D08A0659 | ESCC | Male   | NA          | 7  | DECEASED | 8  | 40  |
| 63  | D08A0660 | ESCC | Female | NA          | 14 | DECEASED | 12 | 100 |
| 64  | D08A0692 | ESCC | Male   | 4*2*1       | 15 | DECEASED | 12 | 20  |
| 65  | D08A0694 | ESCC | Male   | 7.5*4*1.5   | 5  | DECEASED | 12 | 100 |
| 66  | D08A0696 | ESCC | Female | 3*2*1       | 16 | DECEASED | 6  | 30  |
| 67  | D08A0697 | ESCC | Male   | 4.5*3*1     | 84 | LIVING   | 4  | 150 |
| 68  | D08A0699 | ESCC | Male   | 6*6*1.5     | 26 | DECEASED | 12 | 200 |
| 69  | D08A0700 | ESCC | Male   | 7*4*1.5     | 84 | LIVING   | 3  | 50  |
| 70  | D08A0701 | ESCC | Female | 5.5*3*1.5   | 84 | LIVING   | 8  | 300 |
| 71  | D08A0702 | ESCC | Male   | 4*3*1       | 1  | DECEASED | 8  | 200 |
| 72  | D08A0705 | ESCC | Male   | NA          | 83 | LIVING   | 9  | 300 |
| 73  | D08A0718 | ESCC | Female | 5.5*4*1.5   | 5  | DECEASED | 9  | 20  |
| 74  | D08A0719 | ESCC | Female | 2*1*0.8     | 83 | LIVING   | 9  | 200 |
| 75  | D08A0720 | ESCC | Male   | NA          | 4  | DECEASED | 12 | 100 |
| 76  | D08A0721 | ESCC | Male   | 7*4*1       | 15 | DECEASED | 12 | 400 |
| 77  | D08A0722 | ESCC | Male   | 10*3*1      | 55 | DECEASED | 6  | 150 |
| 78  | D08A0723 | ESCC | Male   | 1.5*1*1     | 25 | DECEASED | 4  | 300 |
| 79  | D08A0724 | ESCC | Female | NA          | 10 | DECEASED | 6  | 90  |
| 80  | D08A0745 | ESCC | Male   | NA          | 27 | DECEASED | 12 | 60  |
| 81  | D08A0746 | ESCC | Male   | 5*3*2       | 82 | LIVING   | 6  | 400 |
| 82  | D08A0748 | ESCC | Male   | 6*4.5*1.5   | 81 | LIVING   | 9  | 50  |
| 83  | D08A0752 | ESCC | Female | NA          | 28 | DECEASED | 6  | 100 |
| 84  | D08A0753 | ESCC | Male   | 5*4*2       | 10 | DECEASED | 3  | 20  |
| 85  | D08A0803 | ESCC | Male   | 4.5*3.7*0.5 | 83 | LIVING   | 4  | 200 |
| 86  | D08A0804 | ESCC | Male   | NA          | 10 | DECEASED | 6  | 80  |
| 87  | D08A1719 | ESCC | Female | 6*3.5*0.7   | 10 | DECEASED | 9  | 150 |
| 88  | D08A1720 | ESCC | Female | 4*2*2       | 31 | DECEASED | 9  | 50  |
| 89  | D08A1729 | ESCC | Male   | NA          | 15 | DECEASED | 12 | 100 |
| 90  | D08A1731 | ESCC | Male   | 5.5*3*1.5   | 19 | DECEASED | 4  | 60  |
| 91  | D08A1732 | ESCC | Male   | 2*2*1       | 10 | DECEASED | 9  | 200 |
| 92  | D08A1735 | ESCC | Male   | NA          | 24 | DECEASED | 6  | 60  |
| 93  | D08A1740 | ESCC | Female | 6*3*1.5     | 9  | DECEASED | 6  | 50  |
| 94  | D08A1742 | ESCC | Male   | 7*4*0.8     | 8  | DECEASED | 6  | 20  |
| 95  | D08A1743 | ESCC | Male   | 5*4*1.5     | 27 | DECEASED | 9  | 150 |
| 96  | D08A1746 | ESCC | Male   | 3*3*1       | 23 | DECEASED | 6  | 50  |
| 97  | D08A1747 | ESCC | Female | 1.5*1*0.5   | 4  | DECEASED | 6  | 100 |
| 98  | D08A1750 | ESCC | Female | 6*3.3*1     | 10 | DECEASED | 12 | 200 |
| 99  | D08A1751 | ESCC | Male   | 3*2*1       | 19 | DECEASED | 12 | 100 |
| 100 | D08A1755 | ESCC | Male   | 5.5*3*1.5   | 8  | DECEASED | 6  | 100 |

**Supplementary table S2. ESCC samples list from TCGA database**

| Number | Sample ID       | Cancer Type | Sex    | AJCC Stage | Histologic Grade | Overall Survival (Months) | Overall Survival Status | Informed consent verified |
|--------|-----------------|-------------|--------|------------|------------------|---------------------------|-------------------------|---------------------------|
| 1      | TCGA-IG-A3I8-01 | ESCC        | Female | T3         | G2               | 33.25                     | LIVING                  | YES                       |
| 2      | TCGA-IG-A3QL-01 | ESCC        | Male   | T2         | G2               | 35.18                     | LIVING                  | YES                       |
| 3      | TCGA-IG-A3Y9-01 | ESCC        | Male   | T4         | G2               | 0.85                      | DECEASED                | YES                       |
| 4      | TCGA-IG-A3YA-01 | ESCC        | Male   | T4         | G2               | 20.76                     | LIVING                  | YES                       |
| 5      | TCGA-IG-A3YB-01 | ESCC        | Male   | T3         | G2               | 2.63                      | LIVING                  | YES                       |
| 6      | TCGA-IG-A3YC-01 | ESCC        | Male   | T3         | G2               | 20.11                     | LIVING                  | YES                       |
| 7      | TCGA-IG-A4P3-01 | ESCC        | Male   | T2         | G2               | 18.63                     | DECEASED                | YES                       |
| 8      | TCGA-IG-A50L-01 | ESCC        | Male   | T3         | G2               | 0.53                      | LIVING                  | YES                       |
| 9      | TCGA-IG-A51D-01 | ESCC        | Male   | T1         | G2               | 17.02                     | LIVING                  | YES                       |
| 10     | TCGA-IG-A5B8-01 | ESCC        | Male   | T3         | G1               | 0.79                      | DECEASED                | YES                       |
| 11     | TCGA-IG-A5S3-01 | ESCC        | Female | T3         | G2               | 23.39                     | LIVING                  | YES                       |
| 12     | TCGA-IG-A625-01 | ESCC        | Male   | T3         | G2               | 12.81                     | DECEASED                | YES                       |
| 13     | TCGA-IG-A6QS-01 | ESCC        | Male   | T2         | G1               | 9.95                      | DECEASED                | YES                       |
| 14     | TCGA-IG-A8O2-01 | ESCC        | Male   | T3         | G3               | 4.66                      | DECEASED                | YES                       |
| 15     | TCGA-IG-A97H-01 | ESCC        | Male   | T3         | G3               | 14.49                     | LIVING                  | YES                       |
| 16     | TCGA-IG-A97I-01 | ESCC        | Male   | T2         | G2               | 12.16                     | LIVING                  | YES                       |
| 17     | TCGA-JY-A6FD-01 | ESCC        | Female | T3         | G1               | 67.97                     | LIVING                  | YES                       |
| 18     | TCGA-JY-A6FE-01 | ESCC        | Male   | T3         | G3               | 3.68                      | DECEASED                | YES                       |
| 19     | TCGA-JY-A6FG-01 | ESCC        | Male   | T3         | G2               | 41.49                     | DECEASED                | YES                       |
| 20     | TCGA-JY-A93F-01 | ESCC        | Female | T2         | G1               | 24.01                     | LIVING                  | YES                       |
| 21     | TCGA-KH-A6WC-01 | ESCC        | Male   | T1         | GX               | 6.27                      | LIVING                  | YES                       |
| 22     | TCGA-L5-A43H-01 | ESCC        | Male   | T3         | GX               | 0.3                       | DECEASED                | YES                       |
| 23     | TCGA-L5-A43J-01 | ESCC        | Male   | T3         | G3               | 4.3                       | DECEASED                | YES                       |
| 24     | TCGA-L5-A4OM-01 | ESCC        | Female | T1         | GX               | 47.9                      | DECEASED                | YES                       |
| 25     | TCGA-L5-A88S-01 | ESCC        | Male   | T3         | GX               | 15.47                     | LIVING                  | YES                       |
| 26     | TCGA-L5-A88W-01 | ESCC        | Male   | T3         | GX               | 25.1                      | DECEASED                | YES                       |
| 27     | TCGA-L5-A88Z-01 | ESCC        | Female | T1         | GX               | 7.39                      | LIVING                  | YES                       |
| 28     | TCGA-L5-A8NK-01 | ESCC        | Female | T3         | G1               | 13.53                     | LIVING                  | YES                       |
| 29     | TCGA-L5-A8NQ-01 | ESCC        | Male   | T2         | G3               | 21.35                     | DECEASED                | YES                       |
| 30     | TCGA-L7-A56G-01 | ESCC        | Male   | NA         | G3               | 10.84                     | DECEASED                | YES                       |
| 31     | TCGA-LN-A49K-01 | ESCC        | Male   | T3         | G2               | 5.91                      | DECEASED                | YES                       |
| 32     | TCGA-LN-A49L-01 | ESCC        | Male   | T2         | G2               | 10.45                     | DECEASED                | YES                       |
| 33     | TCGA-LN-A49M-01 | ESCC        | Male   | T2         | G1               | 12.65                     | LIVING                  | YES                       |
| 34     | TCGA-LN-A49N-01 | ESCC        | Male   | T2         | G2               | 12.42                     | LIVING                  | YES                       |
| 35     | TCGA-LN-A49O-01 | ESCC        | Male   | T3         | G3               | 13.4                      | LIVING                  | YES                       |
| 36     | TCGA-LN-A49P-01 | ESCC        | Male   | T3         | G2               | 12.32                     | LIVING                  | YES                       |
| 37     | TCGA-LN-A49R-01 | ESCC        | Male   | T3         | G3               | 13.37                     | LIVING                  | YES                       |
| 38     | TCGA-LN-A49S-01 | ESCC        | Male   | T3         | G2               | 13.14                     | LIVING                  | YES                       |
| 39     | TCGA-LN-A49U-01 | ESCC        | Male   | T3         | G1               | 15.34                     | LIVING                  | YES                       |
| 40     | TCGA-LN-A49W-01 | ESCC        | Male   | T3         | G3               | 13.24                     | LIVING                  | YES                       |
| 41     | TCGA-LN-A49X-01 | ESCC        | Male   | T3         | G2               | 12.61                     | LIVING                  | YES                       |
| 42     | TCGA-LN-A49Y-01 | ESCC        | Male   | T3         | G2               | 12.45                     | LIVING                  | YES                       |
| 43     | TCGA-LN-A4A1-01 | ESCC        | Male   | T3         | G3               | 12.58                     | LIVING                  | YES                       |

|    |                 |      |        |    |    |       |          |     |
|----|-----------------|------|--------|----|----|-------|----------|-----|
| 44 | TCGA-LN-A4A2-01 | ESCC | Male   | T3 | G1 | 12.48 | LIVING   | YES |
| 45 | TCGA-LN-A4A3-01 | ESCC | Male   | T3 | G2 | 12.75 | LIVING   | YES |
| 46 | TCGA-LN-A4A4-01 | ESCC | Male   | T3 | GX | 12.58 | LIVING   | YES |
| 47 | TCGA-LN-A4A5-01 | ESCC | Male   | T2 | G2 | 22.37 | DECEASED | YES |
| 48 | TCGA-LN-A4A6-01 | ESCC | Male   | T2 | G2 | 12.84 | LIVING   | YES |
| 49 | TCGA-LN-A4A8-01 | ESCC | Male   | T2 | G2 | 15.51 | LIVING   | YES |
| 50 | TCGA-LN-A4A9-01 | ESCC | Male   | T2 | G1 | 11.53 | DECEASED | YES |
| 51 | TCGA-LN-A4MQ-01 | ESCC | Male   | T3 | G3 | 12.32 | LIVING   | YES |
| 52 | TCGA-LN-A4MR-01 | ESCC | Male   | T2 | G2 | 13.21 | LIVING   | YES |
| 53 | TCGA-LN-A5U5-01 | ESCC | Male   | T3 | G2 | 4.47  | DECEASED | YES |
| 54 | TCGA-LN-A5U6-01 | ESCC | Male   | T2 | G2 | 12.32 | LIVING   | YES |
| 55 | TCGA-LN-A5U7-01 | ESCC | Male   | T2 | G1 | 25.23 | LIVING   | YES |
| 56 | TCGA-LN-A7HV-01 | ESCC | Male   | T2 | G1 | 10.51 | LIVING   | YES |
| 57 | TCGA-LN-A7HW-01 | ESCC | Male   | T2 | G2 | 11.99 | LIVING   | YES |
| 58 | TCGA-LN-A7HX-01 | ESCC | Male   | T2 | G2 | 12.22 | LIVING   | YES |
| 59 | TCGA-LN-A7HY-01 | ESCC | Male   | T3 | G2 | 12.02 | LIVING   | YES |
| 60 | TCGA-LN-A7HZ-01 | ESCC | Male   | T2 | G2 | 13.17 | LIVING   | YES |
| 61 | TCGA-LN-A8HZ-01 | ESCC | Male   | T2 | G3 | 12.32 | LIVING   | YES |
| 62 | TCGA-LN-A8I0-01 | ESCC | Male   | T2 | G2 | 13.37 | LIVING   | YES |
| 63 | TCGA-LN-A8I1-01 | ESCC | Female | T2 | G3 | 13.17 | LIVING   | YES |
| 64 | TCGA-LN-A9FO-01 | ESCC | Male   | T2 | G2 | 0.13  | LIVING   | YES |
| 65 | TCGA-LN-A9FP-01 | ESCC | Female | T2 | G3 | 12.02 | LIVING   | YES |
| 66 | TCGA-LN-A9FQ-01 | ESCC | Male   | T3 | G3 | 12.84 | LIVING   | YES |
| 67 | TCGA-LN-A9FR-01 | ESCC | Male   | T2 | G2 | 12.25 | LIVING   | YES |
| 68 | TCGA-Q9-A6FU-01 | ESCC | Female | T3 | G2 | 5.16  | DECEASED | YES |
| 69 | TCGA-S8-A6BW-01 | ESCC | Male   | T2 | G1 | 20.37 | LIVING   | YES |
| 70 | TCGA-V5-A7RC-01 | ESCC | Male   | NA | GX | 3.42  | DECEASED | YES |
| 71 | TCGA-V5-AASV-01 | ESCC | Male   | T3 | G3 | 15.34 | LIVING   | YES |
| 72 | TCGA-VR-A8EO-01 | ESCC | Male   | T3 | G3 | 25.79 | LIVING   | YES |
| 73 | TCGA-VR-A8EP-01 | ESCC | Male   | T3 | G3 | 27.07 | LIVING   | YES |
| 74 | TCGA-VR-A8ER-01 | ESCC | Male   | T4 | GX | 12.42 | DECEASED | YES |
| 75 | TCGA-VR-A8ET-01 | ESCC | Male   | T2 | G2 | 1.54  | DECEASED | YES |
| 76 | TCGA-VR-A8EU-01 | ESCC | Male   | T1 | G2 | 18.3  | DECEASED | YES |
| 77 | TCGA-VR-A8EW-01 | ESCC | Male   | T3 | G2 | 8.11  | DECEASED | YES |
| 78 | TCGA-VR-A8EX-01 | ESCC | Male   | T1 | G2 | 28.09 | DECEASED | YES |
| 79 | TCGA-VR-A8EY-01 | ESCC | Female | T3 | G1 | 33.67 | LIVING   | YES |
| 80 | TCGA-VR-A8EZ-01 | ESCC | Male   | T3 | G2 | 18.17 | DECEASED | YES |
| 81 | TCGA-VR-AA4G-01 | ESCC | Female | T2 | G2 | 18.04 | LIVING   | YES |
| 82 | TCGA-VR-AA7B-01 | ESCC | Female | T3 | G2 | 11.24 | LIVING   | YES |
| 83 | TCGA-VR-AA7D-01 | ESCC | Male   | T3 | G2 | 9.17  | DECEASED | YES |
| 84 | TCGA-VR-AA7I-01 | ESCC | Male   | T4 | G1 | 15.9  | DECEASED | YES |
| 85 | TCGA-XP-A8T6-01 | ESCC | Male   | T2 | G2 | 25.07 | DECEASED | YES |
| 86 | TCGA-XP-A8T8-01 | ESCC | Male   | T1 | G1 | 14.36 | LIVING   | YES |
| 87 | TCGA-Z6-A8JD-01 | ESCC | Male   | T3 | G2 | 3.42  | LIVING   | YES |
| 88 | TCGA-Z6-A8JE-01 | ESCC | Male   | T3 | G3 | 2.1   | LIVING   | YES |
| 89 | TCGA-Z6-A9VB-01 | ESCC | Male   | T3 | G2 | 1.31  | LIVING   | YES |
| 90 | TCGA-Z6-AAPN-01 | ESCC | Male   | T3 | G1 | 2.66  | LIVING   | YES |

**Supplementary table S3. Mouse (m) and Human (h) Primers for PCR**

| Primers   | Sequence (5' to 3')     |
|-----------|-------------------------|
| mCCL2-F   | GCATCCACGTGTTGGCTCAG    |
| mCCL2-R   | TTCTTGGGGTCAGCACAGAC    |
| mCCR2-F   | TCTTCCTGCTCACATTACCA    |
| mCCR2-R   | GCCAAGTACCTATCAATTGT    |
| mIL-12b-F | TTGAACTGGCGTTGGAAGCACG  |
| mIL-12b-R | CCACCTGTGAGTTCTTCAAAGGC |
| mIL-13-F  | AACGGCAGCATGGTATGGAGTG  |
| mIL-13-R  | TGGGTCCTGTAGATGGCATTGC  |
| mIL-10-F  | CGGGAAGACAATAACTGCACCC  |
| mIL-10-R  | CGGTTAGCAGTATGTTGTCCAGC |
| mPD1-F    | CCCAAGGCAAAAATCGAGGAGAG |
| mPD1-R    | CGAGGGGCTGGGATATCTTG    |
| mPD-L1-F  | AGATCACAGCCAGGGCAAAA    |
| mPD-L1-R  | AGAAGAGGAGGACCGTGGAC    |
| mPD-L2-F  | CTCGTTCCACATACCTCAAGTCC |
| mPD-L2-R  | CTGGAACCTTTAGGATGTGAGTG |
| mMet-F    | GTTCTGCTTGGCAACGAGAGCT  |
| mMet-R    | GGAGAATGCACTGTATTGCGTCG |
| hMET-F    | TGCACAGTTGGTCTGCCATGA   |
| hMET-R    | CAGCCATAGGACCGTATTTCCGG |
| hEGFR-F   | AACACCCTGGTCTGGAAGTACG  |
| hEGFR-R   | TCGTTGGACAGCCTTCAAGACC  |
| mEgfr-F   | GGACTGTGTCTCCTGCCAGAAT  |
| mEgfr-R   | GGCAGACATTCTGGATGGCACT  |
| mBrca1-F  | CGAGGAAATGGCAACTTGCCTAG |
| mBrca1-R  | TCACTCTGCGAGCAGTCTTCAG  |
| hBRCA1-F  | CTGAAGACTGCTCAGGGCTATC  |
| hBRCA1-R  | AGGGTAGCTGTTAGAAGGCTGG  |
| mTrp63-F  | GTATCGGACAGCGCAAAGAACG  |
| mTrp63-R  | CTGGTAGGTACAGCAGCTCATC  |
| hTP63-F   | CAGGAAGACAGAGTGTGCTGGT  |
| hTP63-R   | AATTGGACGGCGGTTTCATCCCT |
| mSox2-F   | AACGGCAGCTACAGCATGATGC  |
| mSox2-R   | CGAGCTGGTCATGGAGTTGTAC  |
| hSOX2-F   | GCTACAGCATGATGCAGGACCA  |
| hSOX2-R   | TCTGCGAGCTGGTCATGGAGTT  |
| mMyc-F    | TCGCTGCTGTCTCCGAGTCC    |
| mMyc-R    | GGTTTGCCTTCTCCACAGAC    |
| hMYC-F    | CCTGGTGCTCCATGAGGAGAC   |
| hMYC-R    | CAGACTCTGACCTTTTGCCAGG  |
| mCd44-F   | CGGAACCACAGCCTCCTTTCAA  |
| mCd44-R   | TGCCATCCGTTCTGAAACCACG  |
| hCD44-F   | CCAGAAGGAACAGTGGTTTGGC  |
| hCD44-R   | ACTGTCCTCTGGGCTTGGTGT   |

### Supplementary materials S4. Reagents and antibodies

| Catlog #   | Reagent Name                                                             | Clone       | Vendor        | Application             |
|------------|--------------------------------------------------------------------------|-------------|---------------|-------------------------|
| CC-3170    | BEGM Bullet Kit                                                          | Not applied | Lonza         | Cell culture            |
| CC-5002    | Trypsin Neutralizing Solution                                            | Not applied | Lonza         | Cell culture            |
| 279-MC-010 | Recombinant Human CCL2/MCP-1 Protein                                     | Not applied | R&D           | Chemotaxis              |
| CBA-102    | CytoSelect 24-Well Cell Migration Assay kit (5µm, Fluorometric Format)   | Not applied | Cell biolabs  | Chemotaxis              |
| P8139      | Phorbol 12-myristate 13-acetate                                          | Not applied | Sigma-Aldrich | Macrophage polarization |
| L6529      | Lipopolysaccharides from Escherichia coli O55:B5                         | Not applied | Sigma-Aldrich | Macrophage polarization |
| 300-02     | Recombinant Human IFN-gamma                                              | Not applied | Peprotech     | Macrophage polarization |
| 200-04     | Recombinant Human IL-4                                                   | Not applied | Peprotech     | Macrophage polarization |
| 200-13     | Recombinant human IL-13                                                  | Not applied | Peprotech     | Macrophage polarization |
| LS004176   | Collagenase, Type 2                                                      | Not applied | Worthington   | Cell isolation          |
| 553080     | FITC Rat Anti-Mouse CD45 Antibody                                        | 30-F11      | BD Pharmingen | Flow cytometry          |
| 560527     | PerCP-Cy <sup>TM</sup> 5.5 Rat Anti-Mouse CD3 Molecular Complex Antibody | 17A2        | BD Pharmingen | Flow cytometry          |
| 558694     | APC Mouse anti-Human CD279 Antibody                                      | MIH4        | BD Pharmingen | Flow cytometry          |
| 553049     | PE Rat Anti-Mouse CD4 Antibody                                           | RM4-5       | BD Pharmingen | Flow cytometry          |
| 565410     | PE Rat Anti-Mouse F4/80 Antibody                                         | T45-2342    | BD Pharmingen | Flow cytometry          |
| 550416     | Purified Mouse Anti-Human MCP-1 Antibody                                 | 5D3-F7      | BD Pharmingen | Flow cytometry          |
| 100708     | PE anti-mouse CD8a Antibody                                              | 53-6.7      | Biolegend     | Flow cytometry          |
| 101228     | PerCP/Cy5.5 anti-mouse/human CD11b Antibody                              | M1/70       | Biolegend     | Flow cytometry          |
| 103132     | PerCP/Cy5.5 anti-mouse CD45 Antibody                                     | 30-F11      | Biolegend     | Flow cytometry          |
| 107210     | APC anti-mouse CD273 (B7-DC, PD-L2) Antibody                             | TY25        | Biolegend     | Flow cytometry          |
| 108909     | APC anti-mouse CD49b (pan-NK cells) Antibody                             | DX5         | Biolegend     | Flow cytometry          |
| 115507     | PE anti-mouse CD19 Antibody                                              | 6D5         | Biolegend     | Flow cytometry          |
| 123110     | PE anti-mouse F4/80 Antibody                                             | BM8         | Biolegend     | Flow cytometry          |
| 124312     | APC anti-mouse CD274 (B7-H1, PD-L1) Antibody                             | 10F.9G2     | Biolegend     | Flow cytometry          |
| 127614     | APC anti-mouse Ly-6G Antibody                                            | 1A8         | Biolegend     | Flow cytometry          |
| 128008     | PE anti-mouse Ly-6C Antibody                                             | HK1.4       | Biolegend     | Flow cytometry          |

|              |                                                            |             |                   |                            |
|--------------|------------------------------------------------------------|-------------|-------------------|----------------------------|
| 135210       | APC anti-mouse CD279 (PD-1) Antibody                       | 29F.1A12    | Biolegend         | Flow cytometry             |
| 141708       | APC anti-mouse CD206 (MMR) Antibody                        | C068C2      | Biolegend         | Flow cytometry             |
| 150604       | Alexa Fluor 647 anti-mouse CD192 (CCR2) Antibody           | SA203G11    | Biolegend         | Flow cytometry             |
| 307627       | PerCP anti-human HLA-DR Antibody                           | L243        | Biolegend         | Flow cytometry             |
| 329708       | APC anti-human CD274 (B7-H1, PD-L1) Antibody               | 29E.2A3     | Biolegend         | Flow cytometry             |
| 330106       | PE anti-human CD209 (DC-SIGN) Antibody                     | 9E9A8       | Biolegend         | Flow cytometry             |
| 422302       | Human TruStain FcX™ (Fc Receptor Blocking Solution)        | Not applied | Biolegend         | Flow cytometry             |
| 84651S       | PD-1 Rabbit monoclonal antibody (Mouse Specific)           | D7D5W       | CST               | IHC                        |
| 98941S       | CD8 $\alpha$ Rabbit monoclonal antibody (Mouse Specific)   | D4W2Z       | CST               | IHC                        |
| 83882S       | TIM-3 Rabbit monoclonal antibody (Mouse Specific)          | D3M9R       | CST               | IHC                        |
| 30325S       | F4/80 Rabbit monoclonal antibody                           | D4C8V       | CST               | IHC                        |
| 93668S       | Arginase-1 Rabbit monoclonal antibody                      | D4E3M       | CST               | IHC                        |
| 8125S        | SignalStain Boost IHC Detection Reagent (HRP, Mouse)       | Not applied | CST               | IHC                        |
| MAB2791-100  | Human CCL2/MCP-1 Antibody                                  | 23002       | R&D               | IHC                        |
| MAB2040      | Human CD68/SR-D1 Antibody                                  | 298813      | R&D               | IHC                        |
| MAB55381     | Mouse CCR2 Antibody                                        | 475301      | R&D               | IHC                        |
| MCA341GA     | Mouse anti-rat CD68 Antibody                               | ED1         | Bio-Rad           | IHC                        |
| ab7202       | Anti-MCP1/CCL2 antibody                                    | Polyclonal  | Abcam             | IHC                        |
| RECYTMAG-65K | MILLIplex MAP Rat Cytokine/Chemokine Magnetic Bead Panel   | Not applied | Millipore         | Immunology Multiplex Assay |
| MCYTOMAG-70K | MILLIplex MAP Mouse Cytokine/Chemokine Magnetic Bead Panel | Not applied | Millipore         | Immunology Multiplex Assay |
| 740007       | LEGENDplex™ Mouse Proinflammatory Chemokine Panel          | Not applied | Biolegend         | Immunology Multiplex Assay |
| 740502       | LEGENDplex™ Human Macrophage/Microglia Panel               | Not applied | Biolegend         | Immunology Multiplex Assay |
| 740845       | LEGENDplex™ Mouse Macrophage/Microglia Panel               | Not applied | Biolegend         | Immunology Multiplex Assay |
| AM9932       | Nuclease-Free Water                                        | Not applied | Life Technologies | PCR                        |
| A25742       | PowerUp™ SYBR™ Green Master Mix                            | Not applied | Life Technologies | PCR                        |
| 74004        | RNeasy Micro Kit                                           | Not applied | Qiagen            | PCR                        |

**Supplementary table S5.** Uni- and multi-variate COX proportional hazard model analysis for overall survival of ESCC patients in cohort II

| Variable                    | Univariate |                    | multivariate        |         |
|-----------------------------|------------|--------------------|---------------------|---------|
|                             | HR(95%CI)  | P value            | HR(95%CI)           | P value |
| Gender                      |            | 0.865              |                     | 0.637   |
|                             | Male       | 0.958(0.582-1.576) | 1.155(0.635-2.099)  | 0.637   |
| Age                         |            | 0.055              |                     | 0.104   |
|                             | >65        | 1.539(0.990-2.392) | 1.549(0.914-2.626)  | 0.104   |
| Clinical grade <sup>1</sup> |            | 0.954              |                     | 0.906   |
|                             | II         | 0.922(0.547-1.554) | 0.864(0.449-1.663)  | 0.662   |
|                             | III        | 0.966(0.554-1.683) | 0.892(0.431-1.847)  | 0.758   |
| T stage <sup>2</sup>        |            | 0.241              |                     | 0.936   |
|                             | T3 or T4   | 0.706(0.395-1.262) | 0.963(0.389-2.385)  |         |
| N stage <sup>3</sup>        |            | 0.956              |                     | 0.395   |
|                             | N1         | 0.935(0.559-1.563) | 2.805(0.761-10.346) | 0.121   |
|                             | N2         | 1.113(0.607-2.041) | 3.795(0.830-17.350) | 0.086   |
|                             | N3         | 0.905(0.321-2.552) | 3.654(0.602-22.173) | 0.159   |
| AJCC stage <sup>4</sup>     |            | 0.001*             |                     | 0.008*  |
|                             | 2          | 0.131(0.043-0.402) | 0.115(0.028-0.470)  | 0.003*  |
|                             | 3          | 0.129(0.043-0.392) | 0.035(0.003-0.355)  | 0.005*  |
| Tumor size                  |            | 0.753              |                     | 0.523   |
|                             | >5 cm      | 1.083(0.659-1.778) | 1.209(0.675-2.166)  | 0.523   |
| CCL2 expression             |            | 0.014              |                     | 0.013   |
|                             | high       | 1.729(1.115-2.681) | 1.884(1.141-3.112)  | 0.013*  |

1 Clinical stage was divided into I, II, and III; stage II and III were compared to stage I, respectively.

2 T stage was divided into T1 or T2, T3 or T4; T1 or T2 were set as reference.

3 N stage was divided into N0\N1\N2\N3; N1\N2\N3 were compared to N0 respectively.

4 AJCC stage was divided into 1\2\3. Stage 2 and 3 were compared to stage 1, respectively.



**Supplementary table S6. KEGG pathway enrichment by GSEA analysis**

| <b>PATHWAY NAME</b>                               | <b>SIZE</b> | <b>ES</b> | <b>NES</b> | <b>NOM<br/>p-val</b> | <b>FDR<br/>q-val</b> | <b>FWER<br/>p-val</b> |
|---------------------------------------------------|-------------|-----------|------------|----------------------|----------------------|-----------------------|
| KEGG_TGF_BETA_SIGNALING_PATHWAY                   | 85          | 0.610     | 1.976      | 0.000                | 0.086                | 0.062                 |
| KEGG_T_CELL_RECEPTOR_SIGNALING_PATHWAY            | 108         | 0.613     | 1.922      | 0.000                | 0.048                | 0.091                 |
| KEGG_CHEMOKINE_SIGNALING_PATHWAY                  | 188         | 0.622     | 1.921      | 0.000                | 0.042                | 0.095                 |
| KEGG_TOLL_LIKE_RECEPTOR_SIGNALING_PATHWAY         | 102         | 0.573     | 1.887      | 0.000                | 0.042                | 0.124                 |
| KEGG_PATHWAYS_IN_CANCER                           | 325         | 0.459     | 1.877      | 0.000                | 0.044                | 0.144                 |
| KEGG_CYTOKINE_CYTOKINE_RECEPTOR_INTERACTION       | 264         | 0.652     | 1.843      | 0.000                | 0.043                | 0.186                 |
| KEGG_FOCAL_ADHESION                               | 198         | 0.579     | 1.818      | 0.000                | 0.038                | 0.228                 |
| KEGG_HEMATOPOIETIC_CELL_LINEAGE                   | 84          | 0.725     | 1.784      | 0.000                | 0.045                | 0.282                 |
| KEGG_PRION_DISEASES                               | 35          | 0.603     | 1.753      | 0.000                | 0.051                | 0.354                 |
| KEGG_COMPLEMENT_AND_COAGULATION_CASCADES          | 68          | 0.635     | 1.709      | 0.000                | 0.061                | 0.468                 |
| KEGG_HYPERTROPHIC_CARDIOMYOPATHY_HCM              | 83          | 0.612     | 1.670      | 0.000                | 0.064                | 0.556                 |
| KEGG_MAPK_SIGNALING_PATHWAY                       | 265         | 0.432     | 1.666      | 0.002                | 0.064                | 0.568                 |
| KEGG_ADHERENS_JUNCTION                            | 73          | 0.471     | 1.943      | 0.002                | 0.073                | 0.079                 |
| KEGG_REGULATION_OF_ACTIN_CYTOSKELETON             | 210         | 0.486     | 1.839      | 0.002                | 0.038                | 0.192                 |
| KEGG_CELL_ADHESION_MOLECULES_CAMS                 | 131         | 0.666     | 1.731      | 0.002                | 0.052                | 0.411                 |
| KEGG_ACUTE_MYELOID_LEUKEMIA                       | 57          | 0.469     | 1.925      | 0.002                | 0.060                | 0.090                 |
| KEGG_DILATED_CARDIOMYOPATHY                       | 90          | 0.605     | 1.610      | 0.002                | 0.070                | 0.705                 |
| KEGG_INTESTINAL_IMMUNE_NETWORK_FOR_IGA_PRODUCTION | 46          | 0.747     | 1.706      | 0.002                | 0.060                | 0.472                 |
| KEGG_CHRONIC_MYELOID_LEUKEMIA                     | 73          | 0.441     | 2.014      | 0.002                | 0.104                | 0.041                 |
| KEGG_B_CELL_RECEPTOR_SIGNALING_PATHWAY            | 75          | 0.578     | 1.841      | 0.002                | 0.041                | 0.189                 |
| KEGG_NATURAL_KILLER_CELL_MEDIATED_CYTOTOXICITY    | 132         | 0.598     | 1.747      | 0.002                | 0.049                | 0.369                 |
| KEGG_NOD_LIKE_RECEPTOR_SIGNALING_PATHWAY          | 62          | 0.647     | 1.853      | 0.004                | 0.044                | 0.174                 |
| KEGG_FC_GAMMA_R_MEDIATED_PHAGOCYTOSIS             | 95          | 0.512     | 1.892      | 0.004                | 0.045                | 0.115                 |
| KEGG_JAK_STAT_SIGNALING_PATHWAY                   | 155         | 0.506     | 1.654      | 0.004                | 0.065                | 0.604                 |
| KEGG_ECM_RECEPTOR_INTERACTION                     | 83          | 0.642     | 1.673      | 0.004                | 0.066                | 0.552                 |
| KEGG_TYPE_I_DIABETES_MELLITUS                     | 41          | 0.767     | 1.706      | 0.004                | 0.058                | 0.472                 |
| KEGG_ALLOGRAFT_REJECTION                          | 35          | 0.777     | 1.619      | 0.004                | 0.070                | 0.687                 |
| KEGG_GRAFT_VERSUS_HOST_DISEASE                    | 37          | 0.801     | 1.657      | 0.004                | 0.067                | 0.600                 |
| KEGG_VIRAL_MYOCARDITIS                            | 68          | 0.635     | 1.767      | 0.004                | 0.049                | 0.324                 |
| KEGG_MELANOMA                                     | 71          | 0.512     | 1.606      | 0.006                | 0.070                | 0.713                 |
| KEGG_PANCREATIC_CANCER                            | 70          | 0.399     | 1.790      | 0.006                | 0.045                | 0.272                 |
| KEGG_LEISHMANIA_INFECTION                         | 70          | 0.692     | 1.819      | 0.006                | 0.041                | 0.228                 |
| KEGG_AUTOIMMUNE_THYROID_DISEASE                   | 50          | 0.697     | 1.674      | 0.006                | 0.068                | 0.550                 |
| KEGG_MTOR_SIGNALING_PATHWAY                       | 52          | 0.417     | 1.744      | 0.008                | 0.048                | 0.382                 |
| KEGG_RENAL_CELL_CARCINOMA                         | 70          | 0.418     | 1.830      | 0.008                | 0.039                | 0.207                 |
| KEGG_ASTHMA                                       | 28          | 0.764     | 1.672      | 0.008                | 0.065                | 0.554                 |
| KEGG_ENDOCYTOSIS                                  | 180         | 0.363     | 1.748      | 0.008                | 0.051                | 0.367                 |
| KEGG_ANTIGEN_PROCESSING_AND_PRESENTATION          | 81          | 0.640     | 1.684      | 0.009                | 0.065                | 0.523                 |
